# Supplementary material
Source: publisher figshare collection journal article supplement (https://gsapubs.figshare.com/ndownloader/files/22411104)
Supplement: Supplementary file 1 [file 22411104]

| Name                     | Volcano ID | Latitude | Longitude | Volcano type | Country          | Negative values are BCE            |                                    |                                          | Number of eruptions within<br>'complete record' |    |             | Average Recurrence<br>Interval (years) for<br>VEI >= 4 |
|--------------------------|------------|----------|-----------|--------------|------------------|------------------------------------|------------------------------------|------------------------------------------|-------------------------------------------------|----|-------------|--------------------------------------------------------|
|                          |            |          |           |              |                  | Small Magnitude<br>(SM) Breakpoint | Large Magnitude<br>(LM) Breakpoint | Date of earliest<br>unknown-VEI eruption | SM                                              | LM | Unknown VEI |                                                        |
| Kaikohe-Bay of Islands   | 241010     | -35.3    | 173.9     | Small cone   | New Zealand      | 1855                               | 1453                               | 400                                      | 0                                               | 0  | 1           | 30000                                                  |
| Auckland Field           | 241020     | -36.9    | 174.87    | Small cone   | New Zealand      | 1855                               | 1453                               | 1350                                     | 0                                               | 0  | 1           | 10000                                                  |
| Mayor Island             | 241021     | -37.28   | 176.25    | Shield       | New Zealand      | 1855                               | 1453                               | -6050                                    | 0                                               | 0  | 1           | 200000                                                 |
| Taranaki [Egmont]        | 241030     | -39.3    | 174.07    | Large cone   | New Zealand      | 1855                               | 1453                               | -7650                                    | 0                                               | 1  | 39          | 1910                                                   |
| # White Island           | 241040     | -37.52   | 177.18    | Large cone   | New Zealand      | 1855                               | 1453                               | 0                                        | 31                                              | 0  | 0           | 570                                                    |
| S Okataina               | 241050     | -38.12   | 176.5     | Lava dome    | New Zealand      | 1855                               | 1453                               | -8050                                    | 19                                              | 1  | 3           | 550                                                    |
| Reporoa                  | 241060     | -38.42   | 176.33    | Caldera      | New Zealand      | 1855                               | 1453                               | 1180                                     | 0                                               | 0  | 1           | 5570                                                   |
| Maroa                    | 241061     | -38.42   | 176.08    | Caldera      | New Zealand      | 1855                               | 1453                               | -7050                                    | 0                                               | 0  | 2           | 30000                                                  |
| + Taupo                  | 241070     | -38.82   | 176       | Caldera      | New Zealand      | -5100                              | -9460                              | 0                                        | 10                                              | 15 | 0           | 390                                                    |
| # Tongariro              | 241080     | -39.157  | 175.632   | Large cone   | New Zealand      | 1855                               | 1453                               | -9850                                    | 66                                              | 0  | 2           | 570                                                    |
| # Ruapehu                | 241100     | -39.28   | 175.57    | Large cone   | New Zealand      | 1855                               | 1453                               | -9850                                    | 57                                              | 0  | 4           | 570                                                    |
| St. Andrew Strait        | 250010     | -2.38    | 147.35    | Large cone   | Papua New Guinea | 1872                               | 308                                | -240                                     | 2                                               | 0  | 2           | 760                                                    |
| # Bam                    | 251010     | -3.613   | 144.818   | Large cone   | Papua New Guinea | 1872                               | 308                                | 1913                                     | 15                                              | 0  | 2           | 1710                                                   |
| S Manam                  | 251020     | -4.08    | 145.037   | Large cone   | Papua New Guinea | 1872                               | 308                                | 1700                                     | 33                                              | 2  | 3           | 820                                                    |
| S Karkar                 | 251030     | -4.649   | 145.964   | Large cone   | Papua New Guinea | 1872                               | 308                                | -870                                     | 7                                               | 2  | 2           | 820                                                    |
| S Long Island            | 251050     | -5.358   | 147.12    | Large cone   | Papua New Guinea | 1872                               | 308                                | 1933                                     | 6                                               | 1  | 3           | 910                                                    |
| Ritter Island            | 251070     | -5.519   | 148.115   | Large cone   | Papua New Guinea | 1872                               | 308                                | 0                                        | 5                                               | 0  | 0           | 320                                                    |
| # Langila                | 252010     | -5.525   | 148.42    | Large cone   | Papua New Guinea | 1872                               | 308                                | 0                                        | 24                                              | 0  | 0           | 1710                                                   |
| Dakataua                 | 252040     | -5.094   | 150.094   | Caldera      | Papua New Guinea | 1872                               | 308                                | 800                                      | 1                                               | 1  | 1           | 800                                                    |
| Krummel-Garbuna-Welcker  | 252070     | -5.416   | 150.027   | Large cone   | Papua New Guinea | 1872                               | 308                                | 0                                        | 3                                               | 0  | 0           | 530                                                    |
| + Witori                 | 252080     | -5.576   | 150.516   | Caldera      | Papua New Guinea | 1872                               | 308                                | -7510                                    | 5                                               | 5  | 6           | 370                                                    |
| Hargy                    | 252100     | -5.33    | 151.1     | Large cone   | Papua New Guinea | 1872                               | 308                                | -5050                                    | 0                                               | 0  | 2           | 39000                                                  |
| Bamus                    | 252110     | -5.2     | 151.23    | Large cone   | Papua New Guinea | 1872                               | 308                                | -350                                     | 1                                               | 0  | 3           | 1350                                                   |
| + Lolobau                | 252130     | -4.92    | 151.158   | Caldera      | Papua New Guinea | 1872                               | 308                                | 0                                        | 0                                               | 3  | 0           | 410                                                    |
| Lamington                | 253010     | -8.95    | 148.15    | Large cone   | Papua New Guinea | 1872                               | 308                                | -5980                                    | 0                                               | 1  | 2           | 13000                                                  |
| Victory                  | 253030     | -9.2     | 149.07    | Large cone   | Papua New Guinea | 1872                               | 308                                | 0                                        | 1                                               | 0  | 0           | 1600                                                   |
| Waiowa                   | 253040     | -9.57    | 149.075   | Small cone   | Papua New Guinea | 1872                               | 308                                | 0                                        | 1                                               | 0  | 0           | 2400                                                   |
| Dawson Strait Group      | 253060     | -9.62    | 150.88    | Small cone   | Papua New Guinea | 1872                               | 308                                | 1350                                     | 0                                               | 0  | 1           | 11000                                                  |
| Newer Volcanics Province | 259010     | -37.77   | 142.5     | Shield       | Australia        | 1855                               | 1866                               | -5850                                    | 0                                               | 0  | 4           | 49000                                                  |
| # Dempo                  | 261230     | -4.03    | 103.13    | Large cone   | Indonesia        | 1770                               | 1575                               | 0                                        | 27                                              | 0  | 0           | 450                                                    |
| Besar                    | 261250     | -4.43    | 103.67    | Large cone   | Indonesia        | 1770                               | 1575                               | 0                                        | 1                                               | 0  | 0           | 2730                                                   |
| Suoh                     | 261270     | -5.25    | 104.27    | Caldera      | Indonesia        | 1770                               | 1575                               | 0                                        | 0                                               | 1  | 0           | 2940                                                   |
| S Krakatau               | 262000     | -6.102   | 105.423   | Caldera      | Indonesia        | 1770                               | 1575                               | 250                                      | 41                                              | 1  | 7           | 425                                                    |
| Perbakti-Gagak           | 263040     | -6.75    | 106.7     | Large cone   | Indonesia        | 1770                               | 1575                               | -6450                                    | 6                                               | 0  | 1           | 455                                                    |
| Salak                    | 263050     | -6.72    | 106.73    | Large cone   | Indonesia        | 1770                               | 1575                               | 0                                        | 5                                               | 0  | 0           | 550                                                    |
| # Gede-Pangrango         | 263060     | -6.77    | 106.965   | Large cone   | Indonesia        | 1770                               | 1575                               | 0                                        | 20                                              | 0  | 0           | 450                                                    |
| # Tangkubanparahu        | 263090     | -6.77    | 107.6     | Large cone   | Indonesia        | 1770                               | 1575                               | -8020                                    | 16                                              | 0  | 3           | 450                                                    |
| Papandayan               | 263100     | -7.32    | 107.73    | Large cone   | Indonesia        | 1770                               | 1575                               | 0                                        | 4                                               | 0  | 0           | 685                                                    |
| # Guntur                 | 263130     | -7.143   | 107.84    | Large cone   | Indonesia        | 1770                               | 1575                               | 1800                                     | 22                                              | 0  | 1           | 450                                                    |
| Galunggung               | 263140     | -7.25    | 108.058   | Large cone   | Indonesia        | 1770                               | 1575                               | 0                                        | 3                                               | 2  | 0           | 665                                                    |
| Cereme                   | 263170     | -6.892   | 108.4     | Large cone   | Indonesia        | 1770                               | 1575                               | 0                                        | 5                                               | 0  | 0           | 550                                                    |
| # Slamet                 | 263180     | -7.242   | 109.208   | Large cone   | Indonesia        | 1770                               | 1575                               | 1937                                     | 40                                              | 0  | 1           | 450                                                    |
| # Dieng Volcanic Complex | 263200     | -7.2     | 109.92    | Large cone   | Indonesia        | 1770                               | 1575                               | -500                                     | 21                                              | 0  | 2           | 450                                                    |
| Sundoro                  | 263210     | -7.3     | 109.992   | Large cone   | Indonesia        | 1770                               | 1575                               | 230                                      | 9                                               | 0  | 2           | 295                                                    |
| Sumbing                  | 263220     | -7.384   | 110.07    | Large cone   | Indonesia        | 1770                               | 1575                               | 0                                        | 2                                               | 0  | 0           | 1370                                                   |
| Merbabu                  | 263240     | -7.45    | 110.43    | Large cone   | Indonesia        | 1770                               | 1575                               | 1560                                     | 1                                               | 0  | 1           | 1780                                                   |
| S Merapi                 | 263250     | -7.542   | 110.442   | Large cone   | Indonesia        | 1770                               | 1575                               | -8780                                    | 47                                              | 2  | 24          | 213                                                    |
| Muria                    | 263251     | -6.62    | 110.88    | Large cone   | Indonesia        | 1770                               | 1575                               | -160                                     | 0                                               | 0  | 1           | 24000                                                  |
| Lawu                     | 263260     | -7.625   | 111.192   | Large cone   | Indonesia        | 1770                               | 1575                               | 0                                        | 1                                               | 0  | 0           | 2730                                                   |
| + Kelut                  | 263280     | -7.93    | 112.308   | Large cone   | Indonesia        | 1770                               | 1575                               | -230                                     | 14                                              | 8  | 1           | 61                                                     |
| Arjuno-Welirang          | 263290     | -7.725   | 112.58    | Large cone   | Indonesia        | 1770                               | 1575                               | 0                                        | 2                                               | 0  | 0           | 1370                                                   |
| # Semeru                 | 263300     | -8.108   | 112.92    | Large cone   | Indonesia        | 1770                               | 1575                               | 0                                        | 58                                              | 0  | 0           | 450                                                    |
| # Tengger Caldera        | 263310     | -7.942   | 112.95    | Large cone   | Indonesia        | 1770                               | 1575                               | -5260                                    | 59                                              | 0  | 1           | 450                                                    |
| # Lamongan               | 263320     | -7.979   | 113.342   | Large cone   | Indonesia        | 1770                               | 1575                               | 0                                        | 41                                              | 0  | 0           | 450                                                    |
| + Raung                  | 263340     | -8.119   | 114.056   | Large cone   | Indonesia        | 1770                               | 1575                               | 1849                                     | 56                                              | 3  | 2           | 112                                                    |
| Ijen                     | 263350     | -8.058   | 114.242   | Large cone   | Indonesia        | 1770                               | 1575                               | -640                                     | 8                                               | 0  | 1           | 340                                                    |
| # Batur                  | 264010     | -8.242   | 115.375   | Caldera      | Indonesia        | 1770                               | 1575                               | 0                                        | 25                                              | 0  | 0           | 450                                                    |
| Agung                    | 264020     | -8.342   | 115.508   | Large cone   | Indonesia        | 1770                               | 1575                               | 0                                        | 1                                               | 2  | 0           | 1300                                                   |
| # Rinjani                | 264030     | -8.42    | 116.47    | Large cone   | Indonesia        | 1770                               | 1575                               | 0                                        | 13                                              | 0  | 0           | 450                                                    |
| # Karangetang            | 267020     | 2.78     | 125.4     | Large cone   | Indonesia        | 1770                               | 1575                               | 0                                        | 51                                              | 0  | 0           | 450                                                    |
| S Awu                    | 267040     | 3.67     | 125.5     | Large cone   | Indonesia        | 1770                               | 1575                               | 0                                        | 12                                              | 2  | 0           | 200                                                    |
| Parker                   | 271011     | 6.113    | 124.892   | Large cone   | Philippines      | 1808                               | 1340                               | 0                                        | 0                                               | 2  | 0           | 3760                                                   |
| Matutum                  | 271020     | 6.37     | 125.07    | Large cone   | Philippines      | 1808                               | 1340                               | -400                                     | 0                                               | 0  | 3           | 8950                                                   |
| Leonard Range            | 271031     | 7.382    | 126.047   | Large cone   | Philippines      | 1808                               | 1340                               | -4090                                    | 0                                               | 0  | 3           | 23000                                                  |
| Makaturing               | 271040     | 7.647    | 124.32    | Large cone   | Philippines      | 1808                               | 1340                               | 1882                                     | 1                                               | 0  | 1           | 910                                                    |
| Ragang                   | 271060     | 7.7      | 124.5     | Large cone   | Philippines      | 1808                               | 1340                               | 0                                        | 6                                               | 0  | 0           | 385                                                    |
| Musuan                   | 271070     | 7.877    | 125.068   | Lava dome    | Philippines      | 1808                               | 1340                               | 0                                        | 1                                               | 0  | 0           | 800                                                    |
| Camiguin                 | 271080     | 9.203    | 124.673   | Large cone   | Philippines      | 1808                               | 1340                               | 0                                        | 4                                               | 0  | 0           | 580                                                    |
| # Kanlaon                | 272020     | 10.412   | 123.132   | Large cone   | Philippines      | 1808                               | 1340                               | 0                                        | 28                                              | 0  | 0           | 680                                                    |
| # Cabalian               | 272050     | 10.285   | 125.218   | Large cone   | Philippines      | 1808                               | 1340                               | 1820                                     | 0                                               | 0  | 1           | 2200                                                   |
| # Bulusan                | 273010     | 12.77    | 124.05    | Large cone   | Philippines      | 1808                               | 1340                               | -3050                                    | 18                                              | 0  | 3           | 680                                                    |
| S Mayon                  | 273030     | 13.257   | 123.685   | Large cone   | Philippines      | 1808                               | 1340                               | -3100                                    | 51                                              | 2  | 4           | 335                                                    |
| Isarog                   | 273042     | 13.658   | 123.38    | Large cone   | Philippines      | 1808                               | 1340                               | -3500                                    | 0                                               | 0  | 1           | 61000                                                  |
| San Pablo Volcanic Field | 273060     | 14.12    | 121.3     | Large cone   | Philippines      | 1808                               | 1340                               | 1350                                     | 0                                               | 0  | 1           | 7400                                                   |
| + Taal                   | 273070     | 14.002   | 120.993   | Caldera      | Philippines      | 1808                               | 1340                               | 0                                        | 16                                              | 4  | 0           | 83                                                     |
| Mariveles                | 273081     | 14.52    | 120.47    | Large cone   | Philippines      | 1808                               | 1340                               | -2050                                    | 0                                               | 0  | 1           | 45000                                                  |
| Pinatubo                 | 273083     | 15.13    | 120.35    | Large cone   | Philippines      | 1808                               | 1340                               | -7030                                    | 1                                               | 2  | 1           | 1410                                                   |
| Cagua                    | 273090     | 18.222   | 122.123   | Large cone   | Philippines      | 1808                               | 1340                               | 0                                        | 1                                               | 0  | 0           | 2310                                                   |
| Camiguin de Babuyanes    | 274010     | 18.83    | 121.86    | Large cone   | Philippines      | 1808                               | 1340                               | 0                                        | 1                                               | 0  | 0           | 2310                                                   |
| Didicas                  | 274020     | 19.077   | 122.202   | Large cone   | Philippines      | 1808                               | 1340                               | 0                                        | 4                                               | 0  | 0           | 580                                                    |
| S Babuyan Claro          | 274030     | 19.523   | 121.94    | Large cone   | Philippines      | 1808                               | 1340                               | 0                                        | 6                                               | 1  | 0           | 640                                                    |
| Iraya                    | 274060     | 20.469   | 122.01    | Large cone   | Philippines      | 1808                               | 1340                               | 250                                      | 0                                               | 0  | 1           | 20000                                                  |
| Kueishantao              | 281031     | 24.84    | 121.953   | Large cone   | Taiwan           | 1542                               | -382                               | 0                                        | 1                                               | 0  | 0           | 5270                                                   |
| Tatun Group              | 281032     | 25.17    | 121.52    | Lava dome    | Taiwan           | -4095                              | -382                               | 0                                        | 2                                               | 0  | 0           | 12000                                                  |
| Kikai                    | 282060     | 30.789   | 130.308   | Caldera      | Japan            | 1542                               | -997                               | -3250                                    | 9                                               | 0  | 9           | 320                                                    |
| + Ata                    | 282070     | 31.22    | 130.57    | Caldera      | Japan            | 1542                               | -997                               | -5050                                    | 0                                               | 11 | 2           | 155                                                    |
| + Aira                   | 282080     | 31.593   | 130.657   | Caldera      | Japan            | 1542                               | -997                               | -7750                                    | 24                                              | 4  | 8           | 385                                                    |
| Yonemaru-Sumiyoshiike    | 282081     | 31.771   | 130.592   | Small cone   | Japan            | 1542                               | -997                               | 0                                        | 3                                               | 0  | 0           | 69000                                                  |
| S Kirishimayama          | 282090     | 31.934   | 130.862   | Shield       | Japan            | 1542                               | -997                               | 700                                      | 53                                              | 2  | 3           | 1470                                                   |
| Fukue                    | 282091     | 32.657   | 128.849   | Shield       | Japan            | 1542                               | -997                               | -400                                     | 0                                               | 0  | 1           | 60000                                                  |

|   | Name               | Volcano ID | Latitude | Longitude | Volcano type | Country           | Negative values are BCE         |                                 |                                       | Number of eruptions within 'complete record' |    |             | Average Recurrence interval (years) for VEI >= 4 |
|---|--------------------|------------|----------|-----------|--------------|-------------------|---------------------------------|---------------------------------|---------------------------------------|----------------------------------------------|----|-------------|--------------------------------------------------|
|   |                    |            |          |           |              |                   | Small Magnitude (SM) Breakpoint | Large Magnitude (LM) Breakpoint | Date of earliest unknown-VEI eruption | SM                                           | LM | Unknown VEI |                                                  |
|   | Unzendake          | 282100     | 32.761   | 130.299   | Large cone   | Japan             | 1542                            | -997                            | -2720                                 | 4                                            | 0  | 1           | 1285                                             |
| # | Asosan             | 282110     | 32.884   | 131.104   | Caldera      | Japan             | 1542                            | -997                            | -3610                                 | 124                                          | 0  | 6           | 3020                                             |
|   | Kujusan            | 282120     | 33.086   | 131.249   | Large cone   | Japan             | 1542                            | -997                            | -7180                                 | 3                                            | 2  | 2           | 1540                                             |
|   | Yufu-Tsurumi       | 282130     | 33.282   | 131.39    | Lava dome    | Japan             | 1542                            | -997                            | 0                                     | 0                                            | 1  | 0           | 12000                                            |
|   | Abu                | 283001     | 34.5     | 131.6     | Shield       | Japan             | 1542                            | -997                            | -6850                                 | 0                                            | 0  | 1           | 222000                                           |
|   | Sanbesan           | 283002     | 35.139   | 132.621   | Large cone   | Japan             | 1542                            | -997                            | -3550                                 | 0                                            | 0  | 2           | 31000                                            |
|   | Izu-Tobu           | 283010     | 34.9     | 139.098   | Small cone   | Japan             | 1542                            | -997                            | -2050                                 | 1                                            | 0  | 1           | 7100                                             |
|   | Hakoneyama         | 283020     | 35.233   | 139.021   | Large cone   | Japan             | 1542                            | -997                            | -1400                                 | 0                                            | 0  | 4           | 9500                                             |
| + | Fujiisan           | 283030     | 35.361   | 138.728   | Large cone   | Japan             | 1542                            | -997                            | -8540                                 | 1                                            | 3  | 28          | 1320                                             |
|   | Yokodake           | 283031     | 36.087   | 138.32    | Large cone   | Japan             | 1542                            | -997                            | -400                                  | 0                                            | 0  | 2           | 13000                                            |
|   | Ontakesan          | 283040     | 35.893   | 137.48    | Large cone   | Japan             | 1542                            | -997                            | 0                                     | 2                                            | 0  | 0           | 2635                                             |
| S | Hakusan            | 283050     | 36.155   | 136.771   | Large cone   | Japan             | 1542                            | -997                            | -7550                                 | 7                                            | 1  | 10          | 2760                                             |
|   | Norikuradake       | 283060     | 36.106   | 137.554   | Large cone   | Japan             | -7700                           | -997                            | 0                                     | 3                                            | 0  | 0           | 36000                                            |
| S | Yakedake           | 283070     | 36.227   | 137.587   | Large cone   | Japan             | 1542                            | -997                            | -850                                  | 26                                           | 1  | 6           | 2885                                             |
|   | Midagahara         | 283080     | 36.571   | 137.59    | Large cone   | Japan             | 1542                            | -997                            | -7300                                 | 2                                            | 0  | 3           | 2450                                             |
| S | Niigata-Yakeyama   | 283090     | 36.921   | 138.036   | Lava dome    | Japan             | 1542                            | -997                            | -1900                                 | 12                                           | 1  | 5           | 2835                                             |
|   | Myokosan           | 283100     | 36.891   | 138.114   | Large cone   | Japan             | 1542                            | -997                            | -4300                                 | 0                                            | 0  | 6           | 12000                                            |
| + | Asamayama          | 283110     | 36.406   | 138.523   | Large cone   | Japan             | 1542                            | -997                            | -7200                                 | 111                                          | 3  | 8           | 720                                              |
| # | Kusatsu-Shiranesan | 283120     | 36.618   | 138.528   | Large cone   | Japan             | 1542                            | -997                            | -6270                                 | 20                                           | 0  | 2           | 3020                                             |
|   | Harunasan          | 283122     | 36.477   | 138.851   | Large cone   | Japan             | 1542                            | -997                            | 0                                     | 0                                            | 2  | 0           | 17000                                            |
|   | Hiuchigatake       | 283131     | 36.955   | 139.285   | Large cone   | Japan             | 1542                            | -997                            | -6050                                 | 1                                            | 0  | 1           | 4970                                             |
|   | Nikko-Shiranesan   | 283140     | 36.799   | 139.376   | Shield       | Japan             | 1542                            | -997                            | -4150                                 | 7                                            | 0  | 4           | 1620                                             |
|   | Nantai             | 283141     | 36.762   | 139.494   | Large cone   | Japan             | 1542                            | -997                            | -9540                                 | 0                                            | 0  | 1           | 130000                                           |
|   | Omanago Group      | 283142     | 36.795   | 139.507   | Lava dome    | Japan             | 1542                            | -997                            | -3050                                 | 0                                            | 0  | 1           | 20000                                            |
|   | Takaharayama       | 283143     | 36.9     | 139.777   | Large cone   | Japan             | 1542                            | -4570                           | 0                                     | 0                                            | 1  | 0           | 73000                                            |
|   | Nasudake           | 283150     | 37.125   | 139.963   | Large cone   | Japan             | 1542                            | -997                            | 0                                     | 5                                            | 0  | 0           | 1055                                             |
|   | Numazawa           | 283151     | 37.444   | 139.566   | Shield       | Japan             | 1542                            | -3400                           | 0                                     | 0                                            | 1  | 0           | 135000                                           |
|   | Bandaisan          | 283160     | 37.601   | 140.072   | Large cone   | Japan             | 1542                            | -997                            | -7450                                 | 2                                            | 1  | 7           | 2100                                             |
|   | Adatarayama        | 283170     | 37.647   | 140.281   | Large cone   | Japan             | 1542                            | -997                            | -1550                                 | 3                                            | 0  | 3           | 1550                                             |
|   | Azumayama          | 283180     | 37.735   | 140.244   | Large cone   | Japan             | 1542                            | -997                            | -4550                                 | 7                                            | 0  | 7           | 700                                              |
| S | Zaozan             | 283190     | 38.144   | 140.44    | Large cone   | Japan             | 1542                            | -997                            | -7600                                 | 26                                           | 1  | 11          | 2935                                             |
|   | Naruko             | 283200     | 38.729   | 140.734   | Caldera      | Japan             | 1542                            | -997                            | -4400                                 | 0                                            | 0  | 4           | 11000                                            |
|   | Kurikomayama       | 283210     | 38.961   | 140.788   | Large cone   | Japan             | 1542                            | -997                            | -3540                                 | 5                                            | 0  | 1           | 1035                                             |
|   | Chokaisan          | 283220     | 39.099   | 140.049   | Large cone   | Japan             | 1542                            | -997                            | -650                                  | 5                                            | 0  | 7           | 845                                              |
|   | Akita-Komagatake   | 283230     | 39.761   | 140.799   | Large cone   | Japan             | 1542                            | -997                            | -7100                                 | 4                                            | 0  | 5           | 1235                                             |
|   | Iwatesan           | 283240     | 39.853   | 141.001   | Large cone   | Japan             | 1542                            | -997                            | -6450                                 | 3                                            | 0  | 19          | 1295                                             |
|   | Hachimantai        | 283250     | 39.958   | 140.854   | Large cone   | Japan             | 1542                            | -997                            | -7900                                 | 0                                            | 0  | 2           | 55000                                            |
| # | Akita-Yakeyama     | 283260     | 39.964   | 140.757   | Large cone   | Japan             | 1542                            | -997                            | -1250                                 | 11                                           | 0  | 4           | 3020                                             |
|   | Megata             | 283262     | 39.95    | 139.73    | Small cone   | Japan             | 1542                            | -997                            | -7050                                 | 0                                            | 0  | 2           | 76000                                            |
| + | Izu-Oshima         | 284010     | 34.724   | 139.394   | Large cone   | Japan             | 1542                            | -997                            | -8450                                 | 42                                           | 6  | 28          | 475                                              |
|   | Toshima            | 284011     | 34.52    | 139.279   | Large cone   | Japan             | 1542                            | -997                            | 0                                     | 1                                            | 0  | 0           | 3160                                             |
|   | Nijijima           | 284020     | 34.397   | 139.27    | Lava dome    | Japan             | 1542                            | -997                            | -5950                                 | 0                                            | 1  | 3           | 5430                                             |
|   | Kozushima          | 284030     | 34.219   | 139.153   | Lava dome    | Japan             | 1542                            | -997                            | -750                                  | 0                                            | 1  | 2           | 3645                                             |
| + | Miyakejima         | 284040     | 34.094   | 139.526   | Large cone   | Japan             | 1542                            | -997                            | -1450                                 | 19                                           | 4  | 1           | 905                                              |
|   | Mikurajima         | 284041     | 33.874   | 139.602   | Large cone   | Japan             | 1542                            | -997                            | -5050                                 | 0                                            | 0  | 2           | 39000                                            |
|   | Hachijojima        | 284050     | 33.137   | 139.766   | Large cone   | Japan             | 1542                            | -997                            | -7650                                 | 2                                            | 0  | 6           | 2300                                             |
|   | Aogashima          | 284060     | 32.458   | 139.759   | Large cone   | Japan             | 1542                            | -997                            | -1200                                 | 3                                            | 1  | 2           | 1530                                             |
|   | Jingbo             | 305040     | 44.08    | 128.83    | Small cone   | China             | 1737                            | 1815                            | -3550                                 | 0                                            | 0  | 3           | 31000                                            |
|   | Longgang Group     | 305050     | 42.33    | 126.5     | Small cone   | China             | 1737                            | 1815                            | 350                                   | 0                                            | 0  | 1           | 28000                                            |
|   | Changbaishan       | 305060     | 41.98    | 128.08    | Large cone   | China-North Korea | 1737                            | 1815                            | 1668                                  | 1                                            | 0  | 3           | 910                                              |
|   | Halla              | 306040     | 33.361   | 126.53    | Shield       | South Korea       | 1737                            | 1815                            | -2830                                 | 0                                            | 0  | 4           | 30000                                            |
